# Supplementary material for: Using Whole-Genome Sequence Data to Predict Quantitative Trait Phenotypes in Drosophila melanogaster
Source: PubMed Central journal article supplement (PMC3342952; doi:10.1371/journal.pgen.1002685), 2012-05-03

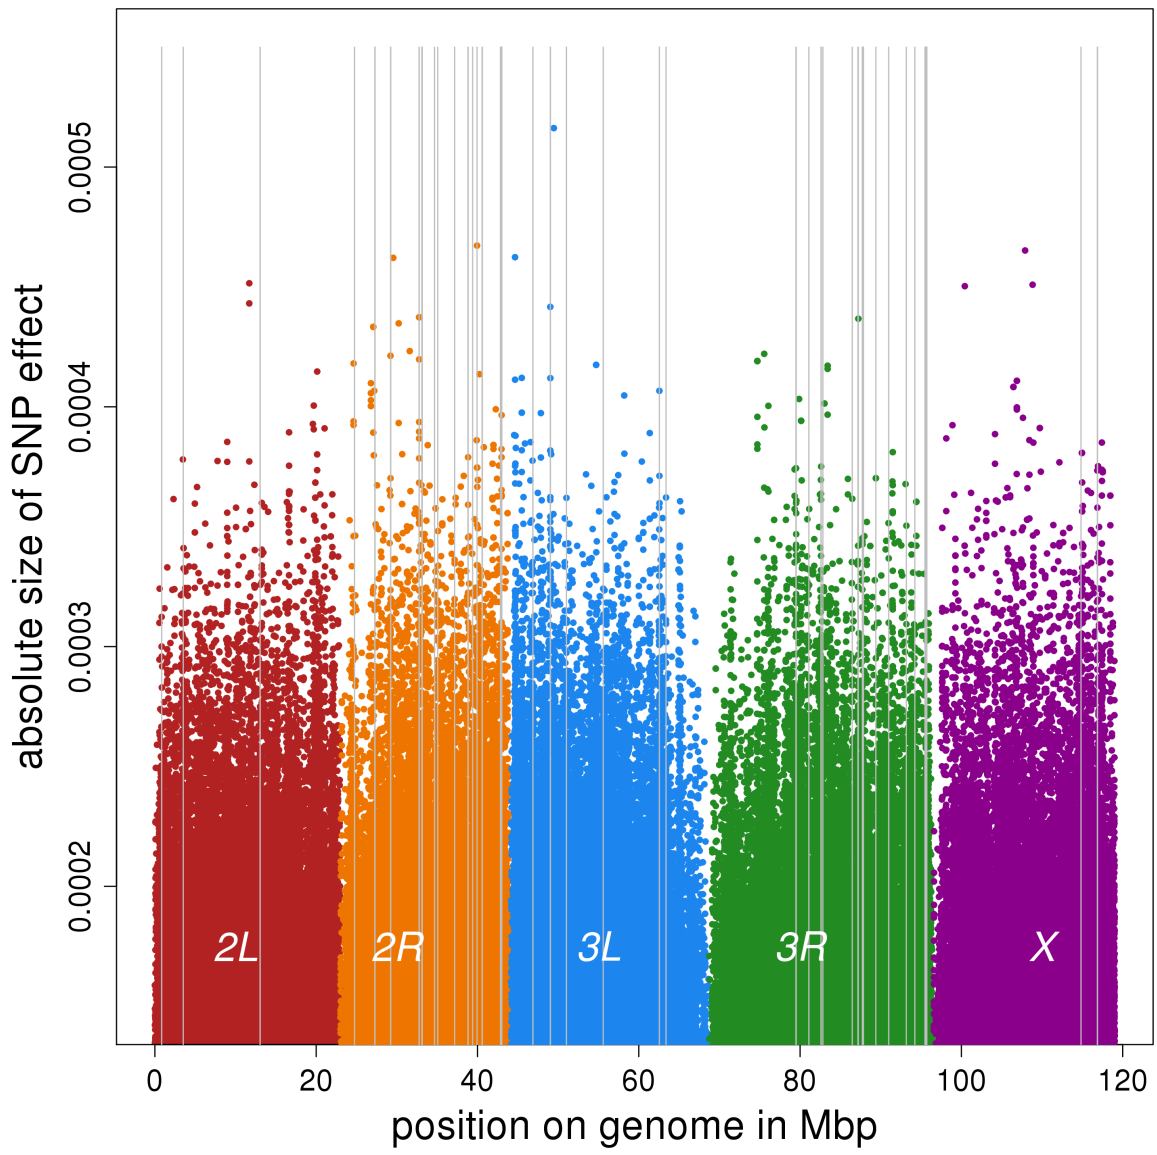

Supplement: pgen.1002685.s002.pdf [file pgen.1002685.s002.pdf]
