# Supplementary material for: Using Whole-Genome Sequence Data to Predict Quantitative Trait Phenotypes in Drosophila melanogaster
Source: PubMed Central journal article supplement (PMC3342952; doi:10.1371/journal.pgen.1002685), 2012-05-03
Supplement: pgen.1002685.s005.pdf [file pgen.1002685.s005.pdf]

**Table S2.** Variance components and heritabilities estimated from GBLUP using all lines. Variance components were estimated by maximum likelihood using the R-package “RandomFields” and its function “fitvario”.

|        | starvation resistance |                    |                            | startle response   |                    |                            |
|--------|-----------------------|--------------------|----------------------------|--------------------|--------------------|----------------------------|
|        | $\hat{\sigma}_g^2$    | $\hat{\sigma}_e^2$ | $\hat{h}_{\text{GBLUP}}^2$ | $\hat{\sigma}_g^2$ | $\hat{\sigma}_e^2$ | $\hat{h}_{\text{GBLUP}}^2$ |
| all    | 62.6                  | 0                  | 1                          | 21.7               | 0                  | 1                          |
| female | 91.2                  | 0                  | 1                          | 22.4               | 0                  | 1                          |
| male   | 57.9                  | 0                  | 1                          | 22.5               | 0                  | 1                          |

Variance components were estimated using the average of the medians of male and female records (“all”) or the medians of female or male records separately as phenotypic data.
