# Supplementary material for: Using Whole-Genome Sequence Data to Predict Quantitative Trait Phenotypes in Drosophila melanogaster
Source: PubMed Central journal article supplement (PMC3342952; doi:10.1371/journal.pgen.1002685), 2012-05-03
Supplement: pgen.1002685.s006.pdf [file pgen.1002685.s006.pdf]

**Table S3.** Results of variance component estimation using ASReml for starvation resistance. Different linear models for individual trait records were investigated.

| Starvation Resistance  | $\hat{\sigma}_{\text{line}}^2$ | $\hat{\sigma}_{\text{sex*line}}^2$ | $\hat{\sigma}_{\text{rep}(\text{sex*line})}^{2,1}$ | $\hat{\sigma}_g^2$ | $\hat{\sigma}_{g \times g}^2$ | $\hat{\sigma}_{\text{residual}}^2$ | $\ln(L)^2$                             | $\hat{H}_{\text{Model 1}}^{2,3}$ | $\hat{h}_{\text{Model 2/3}}^{2,4}$ |
|------------------------|--------------------------------|------------------------------------|----------------------------------------------------|--------------------|-------------------------------|------------------------------------|----------------------------------------|----------------------------------|------------------------------------|
| Model 1                | 87.97 <sup>5</sup> (12.74)     | 39.65 (5.06)                       | 17.00 (1.01)                                       | 88.00 (1.03)       | 0.00                          | 88.00 (1.03)                       | -46097.51                              | 0.59 (0.02)                      |                                    |
| Model 2                | 0.00                           | 39.35 (4.99)                       | 17.00 (1.01)                                       | 43.13 (6.32)       | 0.00                          | 88.00 (1.03)                       | -46093.63 <sup>**</sup> , <sup>6</sup> |                                  | 0.25 (0.03)                        |
| Model 3                | 0.00                           | 39.35 (4.98)                       | 17.00 (1.01)                                       | 43.13 (6.32)       | 0.00                          | 88.00 (1.03)                       | -46093.63                              |                                  | 0.25 (0.03)                        |
| Model 1 f <sup>7</sup> | 167.62 (19.63)                 |                                    | 18.22 (1.64)                                       |                    |                               | 113.92 (1.88)                      | -24174.10                              | 0.60 (0.03)                      |                                    |
| Model 2 f              | 9.07 (28.35)                   |                                    | 18.22 (1.64)                                       | 78.24 (18.02)      |                               | 113.92 (1.88)                      | -24170.31 <sup>**</sup>                |                                  | 0.39 (0.11)                        |
| Model 3 f              | 9.08 (28.34)                   |                                    | 18.22 (1.64)                                       | 78.24 (18.02)      | 0.00                          | 113.92 (1.88)                      | -24170.31                              |                                  | 0.39 (0.11)                        |
| Model 1 m <sup>8</sup> | 87.57 (10.40)                  |                                    | 15.73 (1.21)                                       |                    |                               | 61.89 (1.02)                       | -21617.19                              | 0.59 (0.03)                      |                                    |
| Model 2 m              | 5.23 (15.49)                   |                                    | 15.73 (1.21)                                       | 40.51 (9.68)       |                               | 61.89 (1.02)                       | -21613.34 <sup>**</sup>                |                                  | 0.38 (0.11)                        |
| Model 3 m              | 5.23 (15.49)                   |                                    | 15.73 (1.21)                                       | 40.51 (9.68)       | 0.00                          | 61.89 (1.02)                       | -21613.34                              |                                  | 0.38 (0.11)                        |

<sup>1</sup> or “rep(line)” if factor sex is not included

<sup>2</sup> loglikelihood

<sup>3</sup> broad-sense heritability, standard errors in parentheses

<sup>4</sup> narrow-sense heritability, standard errors in parentheses

<sup>5</sup> estimated variance components, standard errors in parentheses

<sup>6</sup> The superscript \*\* indicates the 1%-significance of Model 2 compared to the Model 1 without  $g$ -component based on a likelihood ratio test.

<sup>7</sup> Only measurements of female *Drosophila* were used.

<sup>8</sup> Only measurements of male *Drosophila* were used.
