# Supplementary material for: Using Whole-Genome Sequence Data to Predict Quantitative Trait Phenotypes in Drosophila melanogaster
Source: PubMed Central journal article supplement (PMC3342952; doi:10.1371/journal.pgen.1002685), 2012-05-03
Supplement: pgen.1002685.s007.pdf [file pgen.1002685.s007.pdf]

**Table S4.** Results of variance component estimation using ASReml for startle response. Different linear models for individual trait records were investigated.

| Startle Response       | $\hat{\sigma}_{\text{line}}^2$ | $\hat{\sigma}_{\text{sex*line}}^2$ | $\hat{\sigma}_{\text{rep}(\text{sex*line})}^{2,1}$ | $\hat{\sigma}_g^2$ | $\hat{\sigma}_{g \times g}^2$ | $\hat{\sigma}_{\text{residual}}^2$ | $\ln(L)^2$  | $\hat{H}_{\text{Model 1}}^{2,3}$ | $\hat{h}_{\text{Model 2/3}}^{2,4}$ |
|------------------------|--------------------------------|------------------------------------|----------------------------------------------------|--------------------|-------------------------------|------------------------------------|-------------|----------------------------------|------------------------------------|
| Model 1                | 33.49 <sup>5</sup> (4.38)      | 0.00                               | 17.81 (1.26)                                       | 16.45 (2.17)       | 25.70 (0.33)                  | -27320.93                          | 0.57 (0.03) | 0.39 (0.03)                      |                                    |
| Model 2                | 0.00                           | 0.00                               | 17.79 (1.26)                                       | 12.98 (11.47)      | 25.70 (0.33)                  | -27317.45** <sup>6</sup>           | 0.57 (0.03) | 0.32 (0.04)                      |                                    |
| Model 3                | 0.00                           | 0.00                               | 17.78 (1.26)                                       | 11.89 (2.34)       | 25.70 (0.33)                  | -27317.41                          | 0.57 (0.03) | 0.32 (0.04)                      |                                    |
| Model 1 f <sup>7</sup> | 24.07 (4.72)                   |                                    | 27.96 (3.33)                                       | 11.89 (2.34)       | 25.26 (0.46)                  | -13746.53                          | 0.49 (0.05) |                                  |                                    |
| Model 2 f              | 0.00                           |                                    | 27.61 (3.25)                                       | 11.89 (2.34)       | 25.26 (0.46)                  | -13743.71*                         | 0.51 (0.04) | 0.32 (0.04)                      |                                    |
| Model 3 f              | 0.00                           |                                    | 27.61 (3.25)                                       | 11.89 (2.34)       | 25.26 (0.46)                  | -13743.71                          | 0.51 (0.04) | 0.32 (0.04)                      |                                    |
| Model 1 m <sup>8</sup> | 27.26 (4.74)                   |                                    | 23.23 (2.81)                                       | 13.34 (2.35)       | 26.13 (0.48)                  | -13682.01                          | 0.51 (0.04) | 0.34 (0.04)                      |                                    |
| Model 2 m              | 0.00                           |                                    | 23.03 (2.77)                                       | 13.34 (2.35)       | 26.13 (0.48)                  | -13678.87*                         | 0.51 (0.04) | 0.34 (0.04)                      |                                    |
| Model 3 m              | 0.00                           |                                    | 23.03 (2.77)                                       | 13.34 (2.35)       | 26.13 (0.48)                  | -13678.87                          | 0.51 (0.04) | 0.34 (0.04)                      |                                    |

<sup>1</sup> or “rep(line)” if factor sex is not included

<sup>2</sup> loglikelihood

<sup>3</sup> broad-sense heritability, standard errors in parentheses

<sup>4</sup> narrow-sense heritability, standard errors in parentheses

<sup>5</sup> estimated variance components, standard errors in parentheses

<sup>6</sup> The superscripts \* and \*\* indicate the 5%- and 1%-significance of Model 2 compared to the Model 1 without  $g$ -component based on a likelihood ratio test.

<sup>7</sup> Only measurements of female *Drosophila* were used.

<sup>8</sup> Only measurements of male *Drosophila* were used.
