# Supplementary material for: Using Whole-Genome Sequence Data to Predict Quantitative Trait Phenotypes in Drosophila melanogaster
Source: PLoS Genet. 2012 May 3;8(5):e1002685. doi: 10.1371/journal.pgen.1002685 (PMC3342952; doi:10.1371/journal.pgen.1002685)
Supplement: Table S1 — Mean and standard deviation of phenotypic values and of the number of individual records per line. (PDF) [file pgen.1002685.s004.pdf]

**Table S1.** Mean and standard deviation of phenotypic values and of the number of individual records per line.

|        | starvation resistance    |                              | startle response |                 |
|--------|--------------------------|------------------------------|------------------|-----------------|
|        | phen. value <sup>1</sup> | # rec. per line <sup>2</sup> | phen. value      | # rec. per line |
| all    | 52.5 ± 10.7              | 104.1 ± 21.5                 | 29.4 ± 6.6       | 80.1 ± 7.4      |
| female | 44.9 ± 10.0              | 52.2 ± 11.2                  | 29.2 ± 6.7       | 40.2 ± 3.9      |
| male   | 60.2 ± 13.4              | 51.8 ± 10.8                  | 29.5 ± 6.7       | 39.8 ± 4.3      |

<sup>1</sup> Phenotypic values were calculated as the average of the medians of male and female records (“all”) or as medians of female or male records separately.

<sup>2</sup> Number of records per line.
